# Supplementary material for: Differential expression of estrogen receptor subtypes and variants in ovarian cancer: effects on cell invasion, proliferation and prognosis
Source: PubMed Central journal article supplement (PMC5579953; doi:10.1186/s12885-017-3601-1), 2017-08-31

**Figure S1.** Box plot showing comparison of the median nER $\beta$ 1 immunoreactivity score in primary carcinomas versus matched metastatic foci.

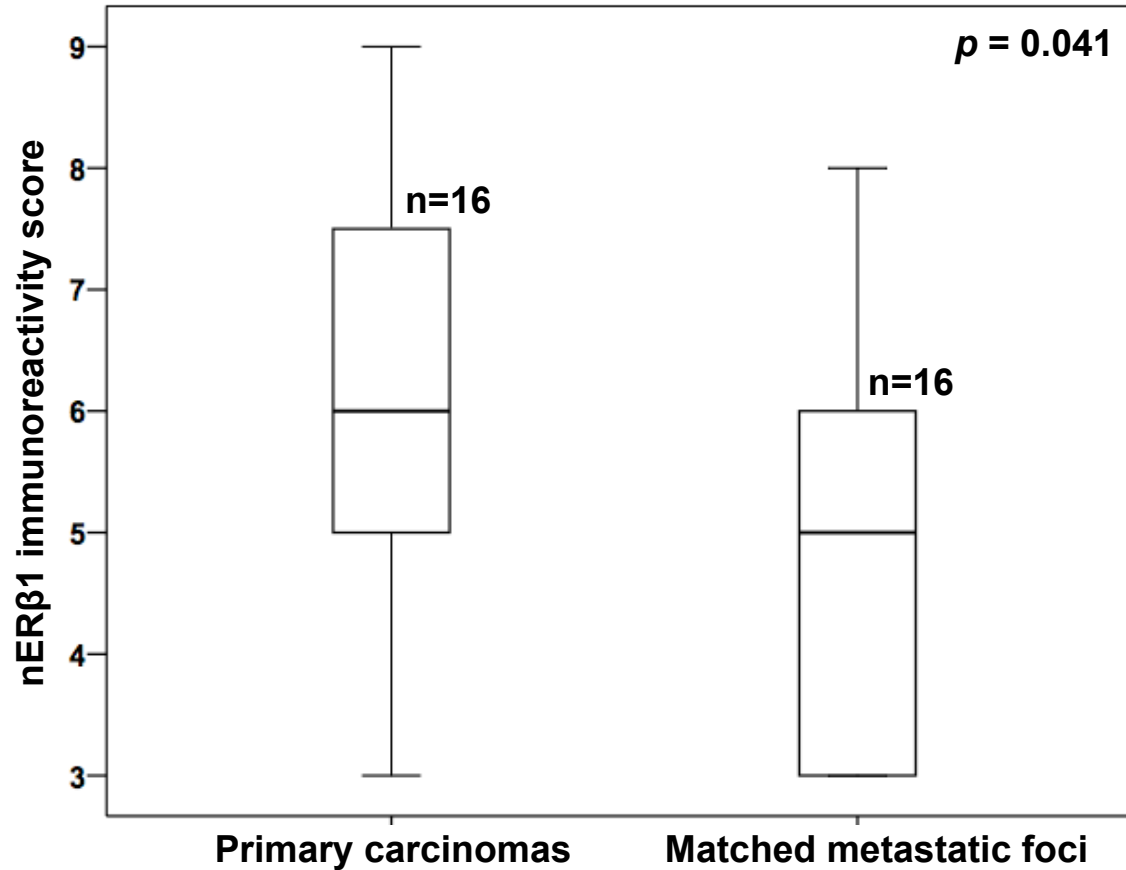

Supplement: 12885_2017_3601_MOESM2_ESM.pdf [file 12885_2017_3601_MOESM2_ESM.pdf]
