# Supplementary material for: Differential expression of estrogen receptor subtypes and variants in ovarian cancer: effects on cell invasion, proliferation and prognosis
Source: PubMed Central journal article supplement (PMC5579953; doi:10.1186/s12885-017-3601-1), 2017-08-31

**Figure S4.** XTT assay revealed lack of significant proliferation effect on day 5 in ES-2 and OVCA420 cells stably transfected with ER $\beta$ 5 as compared to control cells, whereas FAK inh 14 could inhibit OVCA420 basal cell proliferation on day 5. ns, not significant; \*\*,  $P < 0.005$ .

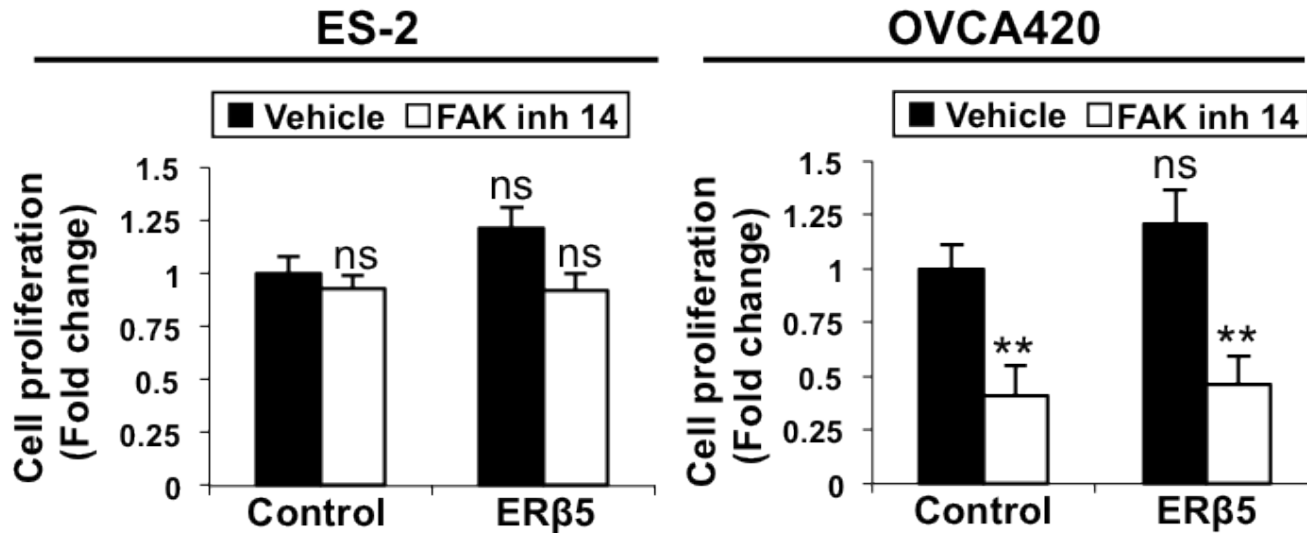

Supplement: 12885_2017_3601_MOESM6_ESM.pdf [file 12885_2017_3601_MOESM6_ESM.pdf]
